# Supplementary material for: Regulation of PPARα by APP in Alzheimer disease affects the pharmacological modulation of synaptic activity
Source: PubMed Central journal article supplement (PMC8410016; doi:10.1172/jci.insight.150099), 2021-08-23

**Regulation of PPAR $\alpha$  by APP in Alzheimer disease impacts the pharmacological modulation of synaptic activity.**

Francisco Sáez-Orellana<sup>1†</sup>, Thomas Leroy<sup>1</sup>, Floriane Ribeiro<sup>1</sup>, Anna Kreis<sup>2</sup>, Karelle Leroy<sup>3</sup>, Fanny Lalloyer<sup>4</sup>, Eric Bauge<sup>4</sup>, Bart Staels<sup>4</sup>, Charles Duyckaerts<sup>5</sup>, Jean-Pierre Brion<sup>3</sup>, Philippe Gailly<sup>2</sup>, Jean-Noël Octave<sup>1</sup>, and Nathalie Pierrot<sup>1,†,\*</sup>.

<sup>1</sup> Université catholique de Louvain, Institute of Neuroscience, Alzheimer Dementia group, B-1200 Brussels, Belgium.

<sup>2</sup> Université catholique de Louvain, Institute of Neuroscience, Laboratory of Cell Physiology, B-1200 Brussels, Belgium.

<sup>3</sup> Université libre de Bruxelles, Laboratory of Histology and Neuropathology, 1070 Brussels, Belgium.

<sup>4</sup> Université de Lille EGID, Inserm, CHU Lille, Institut Pasteur de Lille, U1011, F-59000 Lille, France.

<sup>5</sup> Sorbonne Université, Hôpital de la Pitié-Salpêtrière, Paris Brain Institute (ICM), CNRS UMR7225, INSERM U1127, 75013 Paris, France.

† These authors contributed equally to this work.

\* Correspondence: Nathalie Pierrot, Université catholique de Louvain, Institute of Neuroscience, Alzheimer Dementia, avenue Mounier 53, SSS/IONS/CEMO-Bte B1.53.03, B-1200, Brussels, Belgium. Office: +32 2 764 93 34, E-mail: [nathalie.pierrot@uclouvain.be](mailto:nathalie.pierrot@uclouvain.be)

Thomas Leroy's present affiliation: VIB Center for Brain and Disease Research & KU Leuven, Department of Neurosciences, Gasthuisberg, B-3000 Leuven, Belgium

**Conflict of interest statement:**

The authors have declared that no conflict of interest exists.

**Supplemental Material content:**

- Supplemental Methods
- Supplemental References
- Supplemental Tables
- Supplemental Figures

## I- Supplemental Methods

**Cell cultures.** Cortical cultures were prepared from embryonic day 17 (E17) to E18 Wistar rats or P0-P1 pups from *Ppara*<sup>-/-</sup> and wild-type (WT) mice from the same genetic background of either sex. Pregnant rats and mice were euthanized with CO<sub>2</sub>. Cortices were isolated as previously described (1, 2). Cortical cells were plated in culture dishes (4.10<sup>5</sup> cells/cm<sup>2</sup>) pre-treated with 10 µg/ml poly-L-lysine (Sigma-Aldrich) in phosphate buffered saline (PBS) and cultured for 13-14 days *in vitro* (DIV) in Neurobasal medium supplemented with 2% (v/v) B-27 medium and 0.5 mM L-glutamine without antibiotic solution prior to analyses. The cultures were maintained at 37°C under a 5% CO<sub>2</sub> atmosphere and half of the medium was renewed every 2-3 days.

**Recombinant viruses and cell transduction.** At 6 DIV, cells were infected at a multiplicity of infection (MOI) of 10 in a minimal volume of culture medium for 4 h with adenoviruses and up to analysis with lentiviruses (see below). Infection medium was replaced by fresh culture medium every two days.

**Adenoviruses.** Recombinant adenoviruses encoding wild-type human APP695 (AdhAPP) or human recombinant Green Fluorescent Protein (AdhrGFP) (1.10<sup>10</sup> PFU mL, Vector Biolabs, #1060) were used. AdhAPP was prepared by cloning the pENTCMV shuttle vector containing the cDNA encoding human APP695 into the pAd-REP and was then amplified and purified (1.10<sup>12</sup> viral particles / mL, GeneCust).

**Construction of lentiviral vectors.** Lentiviruses encoding short hairpin RNA (shRNA) construct designed to target mouse/rat APP transcript (shAPP) and a scrambled shRNA encoding GFP (shScra-GFP) used as a negative control were produced. pLKO.1 vectors shAPP were selected using MISSION® shRNA Bacterial Glycerol Stock (Sigma-Aldrich, #SHCLNG-

NM\_007471; TRCN0000054874 Clone ID: NM\_007471.2-2185s1c1 and TRCN0000054876 Clone ID: NM\_007471.2-1583s1c1) and used for construction of recombinant lentiviruses, as previously described (3). Briefly, HEK293T/17 cells ( $6.10^3$  cells /  $\text{cm}^2$ ) (ATCC<sup>®</sup>, Manassas, VA, USA, catalog no. CRL-11268<sup>™</sup>) were cultured in DMEM Nutrient Mix F12 supplemented with 10% Foetal Calf Serum and 0,6% Penicillin-Streptomycin (10000 U / mL) for 24 h prior transfection with Mirus TransIT-293 (Sopachem, #MIR 2700) of the pKLO.1 target plasmid (6  $\mu\text{g}$ ) together with 4.5  $\mu\text{g}$  pCMV delta R8.2 and 1.8  $\mu\text{g}$  pMD2.G lentiviral packaging plasmids (gift from Didier Trono (Addgene plasmids #12263 and #12259; <http://n2t.net/addgene:12263> and 12259; RRID:Addgene\_12263 and \_12259). Supernatants containing the lentiviruses were harvested 48 h after transfection. Lentiviruses were concentrated and purified with the Lenti-X<sup>™</sup> Concentrator kit (Clontech Laboratories, #PT4421-2) according to the manufacturer's instructions and 20 $\mu\text{l}$  of the concentrated lentiviral solution was added to cortical cultures.

### **Immunoblotting analysis**

Cells in culture were washed, scraped off in PBS and centrifuged for 2 min at 16 000 g. Pellets were sonicated in lysis buffer (125 mM Tris (pH 6.8), 20% glycerol, and 4% sodium dodecyl sulfate) with cOmplete Protease Inhibitor Cocktail (Roche, #11697498001). For brain proteins extraction, samples were homogenized in RIPA buffer (1% NP40, 0.5% deoxycholic acid, 0.1% SDS, 150 mM NaCl, 1 mM EDTA, 50 mM Tris, pH 7.4) containing proteases and phosphatases inhibitors cocktail (Roche, #04906837001). The samples were clarified by centrifugation at 20 000g and the protein concentration was determined using a Bicinchoninic Acid Assay (BCA) kit. Samples were heated for 10 min at 70°C in loading buffer (lysis buffer containing 10 % 2-mercaptoethanol and 0.004 % bromophenol blue). Cell and brain lysates (40  $\mu\text{g}$  of proteins) were analyzed by Western blotting using 4-12 % Nupage<sup>™</sup> bis-Tris gels. Nitrocellulose membranes were incubated overnight at 4 °C with primary antibodies as indicated in

Supplemental Table 4. Blots were incubated with HRP peroxidase-conjugated secondary antibodies (1:10000), revealed by ECL (Amersham Pharmacia, #ORT2655-2755) and quantified using the Quantity One™ software (Bio-Rad Laboratories).  $\alpha$ -tubulin was used as internal standard to normalize protein load in gel.

**Semi-quantitative RT-PCR.** Total RNA was isolated from primary cultures of mouse cortical cells prepared from wild type and *Ppara* deficient mice using TriPure Isolation Reagent and 1  $\mu$ g of total RNA was reverse-transcribed (see above, RNA extraction section). Semi-quantitative RT-PCR was carried out after treating total RNA with DNase to remove any contaminating genomic DNA. The resulting cDNA was appropriately diluted and amplified using TaqDNA polymerase. Glyceraldehyde-3-phosphate dehydrogenase (*Gapdh*) was used to ascertain that an equivalent amount of cDNA was synthesized from different samples. Primers (Sigma-Aldrich) used are described in Supplemental Table 5. Amplified products were electrophoresed on a 2% agarose gel and visualized by Midori Green Advance DNA staining (Nippon Genetics Europe, #MG04) with an electrophoresis gel imaging system (Bio-Rad GelDoc 2000).

## II- Supplemental References

1. Pierrot N, Tyteca D, D'auria L, Dewachter I, Gailly P, Hendrickx A, et al. Amyloid precursor protein controls cholesterol turnover needed for neuronal activity. *EMBO Molecular Medicine*. 2013;5(4):608-25.
2. Seibenhener ML, and Wooten MW. Isolation and culture of hippocampal neurons from prenatal mice. *J Vis Exp*. 2012(65).
3. Salmon P, and Trono D. Production and titration of lentiviral vectors. *Curr Protoc Hum Genet*. 2007;Chapter 12:Unit.

### III- Supplemental Tables

|                         | Case number | Age at death (years) | Sex | ApoE genotype | Post-mortem interval (h) | Braak stage | CERAD Plaque score |
|-------------------------|-------------|----------------------|-----|---------------|--------------------------|-------------|--------------------|
| <b>Control subjects</b> | 1           | 79                   | M   | ε3/ε3         | 6.5                      | I           | A                  |
|                         | 2           | 79                   | M   | ε3/ε3         | 6                        | II          | A                  |
|                         | 3           | 78                   | F   | NA            | 7                        | I           | A                  |
|                         | 4           | 78                   | F   | ε3/ε3         | 4.5                      | II          | A                  |
|                         | 5           | 89                   | F   | ε2/ε4         | 35                       | 0-I         | A                  |
|                         | 6           | 72                   | M   | ε3/ε3         | 24                       | 0-I         | A                  |
|                         | 7           | 71                   | F   | ε2/ε3         | 7                        | 0-I         | A                  |
|                         | 8           | 77                   | F   | ε3ε/4         | 48                       | 0-I         | A                  |
| <b>LOAD</b>             | 1           | 77                   | M   | NA            | 6.5                      | VI          | C                  |
|                         | 2           | 74                   | M   | ε4/ε3         | 7.5                      | VI          | C                  |
|                         | 3           | 72                   | M   | ε4/ε2         | 5.3                      | VI          | C                  |
|                         | 4           | 72                   | F   | ε4/ε4         | 6.5                      | VI          | C                  |
|                         | 5           | 73                   | F   | ε4/ε4         | 22                       | V-VI        | C                  |
|                         | 6           | 70                   | F   | ε3/ε3         | 21                       | V-VI        | C                  |
|                         | 7           | 91                   | F   | ε3/ε4         | 5.5                      | V-VI        | C                  |
|                         | 8           | 84                   | M   | ε3/ε3         | 7                        | V-VI        | C                  |
|                         | 9           | 89                   | F   | ε2/ε4         | 7                        | V-VI        | C                  |

|                         | Post-mortem interval (h)<br>Mean ± SEM | Age at death (years)<br>Mean ± SEM | Sex F/M |
|-------------------------|----------------------------------------|------------------------------------|---------|
| <b>Control subjects</b> | 17.2 ± 5.8                             | 77.8 ± 1.9                         | 5/3     |
| <b>LOAD</b>             | 9.8 ± 2.2 <sup>a</sup>                 | 78 ± 2.6 <sup>b</sup>              | 5/4     |

**Supplemental Table 1. Clinical information on sporadic Alzheimer disease patients.** Means of post-mortem interval (<sup>a</sup>) and age (<sup>b</sup>) were not significantly different between control subjects (n=8) and late-onset Alzheimer disease cases (LOAD, n=9) ( $P = 0.5858$  and  $P = 0.9707$ , Mann-Whitney and Student's  $t$  tests, respectively). The neuropathological staging of AD patients is determined according to the Braak and Braak staging and semi-quantitative measure of neuritic plaque density has been estimated as recommended by the Consortium to Establish a Registry for Alzheimer's disease (CERAD). ApoE, apolipoprotein E; NA, not-available; M, male; F, female.

|                  | Case number | Age at death (years) | Sex | ApoE genotype | Post-mortem interval (h) | Braak stage | CERAD Plaque score |
|------------------|-------------|----------------------|-----|---------------|--------------------------|-------------|--------------------|
| Control subjects | 1           | 58                   | M   | NA            | 5.5                      | III         | NA                 |
|                  | 2           | 69                   | M   | NA            | 6                        | 0           | NA                 |
| <i>APPdup</i>    | 3           | 54                   | M   | NA            | NA                       | VI          | NA                 |
|                  | 4           | 59                   | M   | NA            | 5.5                      | V           | C                  |

|                  | Post-mortem interval (h)<br>Mean $\pm$ SEM | Age at death (years)<br>Mean $\pm$ SEM | Sex F/M |
|------------------|--------------------------------------------|----------------------------------------|---------|
| Control subjects | 5.7 $\pm$ 0.2                              | 63.5 $\pm$ 5.5                         | 0/2     |
| <i>APPdup</i>    | 5.5 $\pm$ 0.0 <sup>a</sup>                 | 56.5 $\pm$ 2.5 <sup>b</sup>            | 0/2     |

**Supplemental Table 2. Clinical information on patients with microduplication of the *APP* locus.** Means of post-mortem interval (<sup>a</sup>) and age (<sup>b</sup>) were not significantly different between control subjects (n=2) and early-onset Alzheimer disease rare cases with an *APP* duplication locus (*APPdup*, n=2) ( $P = 0.6667$  and  $P = 0.3662$  Student's *t* test,). The neuropathological staging of AD patients is determined according to the Braak and Braak staging and semi-quantitative measure of neuritic plaque density has been estimated as recommended by the Consortium to Establish a Registry for Alzheimer's disease (CERAD). ApoE, apolipoprotein E; NA, not-available; M, male; F, female.



| Mouse strain                                                            | Primers name                                  | Sequence 5' to 3'         |
|-------------------------------------------------------------------------|-----------------------------------------------|---------------------------|
| <i>Ppara</i> <sup>-/-</sup><br>(JAX stock #008154)                      | oIMR8075<br>(Common)                          | GAGAAGTTGCAGGAGGGGATTGTG  |
|                                                                         | oIMR8076<br>(Wild type Reverse)               | CCCATTTTCGGTAGCAGGTAGTCTT |
|                                                                         | oIMR8077<br>(Mutant Reverse)                  | GCAATCCATCTTGTTC AATGG C  |
| <i>APP</i> <sup>Wt</sup> line I5 ( <i>hAPP</i> )<br>(JAX stock #004662) | oIMR2044<br>Transgene Forward                 | GGTGAGTTTGT AAGTGATGCC    |
|                                                                         | oIMR2045<br>Transgene Reverse                 | TCTTCTTCTTCCACCTCAGC      |
|                                                                         | oIMR8744 Internal<br>Positive Control Forward | CAAATGTTGCTTGTCTGGTG      |
|                                                                         | oIMR8745 Internal<br>Positive Control Reverse | GTCAGTCGAGTGCACAGTTT      |

**Supplemental Table 3. Primers used for genotyping.**

| Protein               | Antibody (Clone)                      | Epitope / Immunogen                                                        | Working dilution | Source (catalog)      |
|-----------------------|---------------------------------------|----------------------------------------------------------------------------|------------------|-----------------------|
| Amyloid $\beta$ (APP) | mouse monoclonal (WO-2)               | Synthetic peptide from human Amyloid- $\beta$ (aa 4-10)                    | 1 : 2000         | Millipore (MABN10)    |
| APP, C-Terminal       | rabbit polyclonal                     | Synthetic peptide from C-terminal of human APP <sub>695</sub> (aa 676-695) | 1 : 4000         | Sigma-Aldrich (A8717) |
| $\alpha$ -Tubulin     | mouse monoclonal (B-5-1-2)            | Epitope located at the C-terminal end of the $\alpha$ -tubulin isoform     | 1 : 4000         | Sigma-Aldrich (T6074) |
| GFP                   | mouse monoclonal (clone 7.1 and 13.1) | Originally isolated from the jellyfish <i>Aequorea victoria</i>            | 1 : 2000         | Roche (11814460001)   |

**Supplemental Table 4. Antibodies, sources, applications and working dilutions used in this study.**

| <b>Gene</b>            | <b>Accession number<br/>(RefSeq)</b> | <b>Primers 5' to 3'<br/>F, Forward; R ,Reverse</b> |
|------------------------|--------------------------------------|----------------------------------------------------|
| <i>Ppara</i> mouse     | NM_011144                            | F- AAACCTTGGACTTGAACGACC<br>R- GCATCCCGTCTTTGTTCA  |
| <i>Gapdh</i> mouse     | NM_008084                            | F- CATGGCCTTCCGTGTTTCCTA<br>R- GCGGCACGTCAGATCCA   |
| <i>ACOX1</i> human     | NM_004035.7                          | F- GCGTTATGAGGTGGCTG<br>R- TCAGCGATGCCAAACTC       |
| <i>CPT1A</i> human     | NM_001876.4                          | F- CAAGATGAGTCGTGCCA<br>R- CGAGGCAGCGATGTCT        |
| <i>PDK4</i> human      | NM_002612.4                          | F- GGAAACCCAAGCCACATT<br>R- CACAGAGCATCCTTGAACACT  |
| <i>RPL32</i> human     | NM_000994.4                          | F- CGTAACTGGCGGAAAC<br>R- TGGCCCTTGAATCTTCTA       |
| <i>Acox1</i> mouse/rat | NM_001271898.1                       | F- GCTGGGCTGAAGGCTTT<br>R- GCTGTGAGAATAGCCGTG      |
| <i>Cpl1a</i> rat       | NM_001031847.2                       | F- CGCAAAGATCAGTCGGA<br>R- ACGCCGCTCACAATG         |
| <i>Cpt1a</i> mouse     | NM_013495.2                          | F- TGGCTTATCGTGGTGGT<br>R- GTGTCTAGGGTCCGATT       |
| <i>Pdk4</i> mouse/rat  | NM_013743.2 mouse<br>NM_053551.1 rat | F- ACACGCTGGTCAAAGTTC<br>R- TGAGCATCCGAGTAGAAAT    |
| <i>Rpl32</i> rat       | NM_013226.2                          | F- CGAAACTGGCGGAAAC<br>R- TGGCCCTTGAATCTTCTC       |
| <i>Rpl32</i> mouse     | NM_172086.2                          | F- CGAAACTGGCGGAAAC<br>R- TGGCCCTTGAACCTTCTC       |

**Supplemental Table 5. Primers used for RT-PCR and real-time PCR analyses.**

#### IV- Supplemental Figures

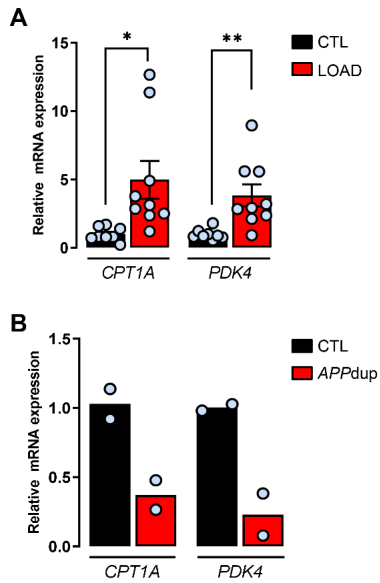

**Supplemental Figure 1. PPAR $\alpha$  downstream target genes expression in brains from patients with Alzheimer disease.** Frontal cortex of postmortem human brain tissues from late-onset (LOAD, n = 9) and early-onset Alzheimer disease cases with an *APP* duplication locus (*APPdup*, n = 2) and respective control subjects (CTL in LOAD and *APPdup* cases, n = 8 and 2, respectively) were analyzed. (**A** and **B**) Quantitative real time PCR analyses for *CPT1A* and *PDK4* mRNA levels. Results were normalized to *ACTB* mRNA and relative differences are expressed according to respective CTL as mean  $\pm$  SEM (LOAD: *CPT1A* mRNA,  $P = 0.016$ ; *PDK4* mRNA,  $P = 0.017$ ; Student's t-test), \* $P < 0.05$ , \*\* $P < 0.01$ .

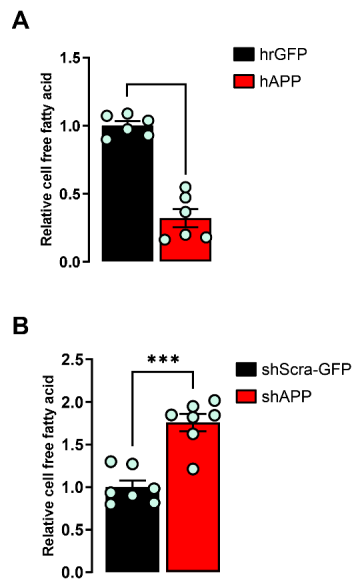

**Supplemental Figure 2. Free fatty acid content in cortical cultured cells.** Primary cultures of rat cortical cells were infected with adenoviruses encoding human recombinant GFP (hrGFP) or APP (hAPP) (**A**,  $n = 6$ ) or with lentiviruses encoding a shRNA targeting endogenous APP (shAPP) or a scrambled shRNA encoding GFP (shScra-GFP) (**B**,  $n = 7$ ). At 13-14 DIV, cell free fatty acid content was measured in 3 independent experiments. Relative differences are expressed according to respective control as mean  $\pm$  SEM; \*\*\* $P < 0.0001$ ; Student's t-test.

D

Full unedited gel for Figure 1

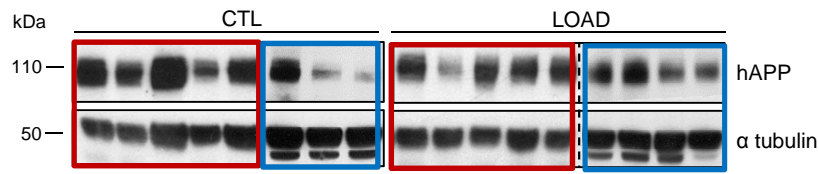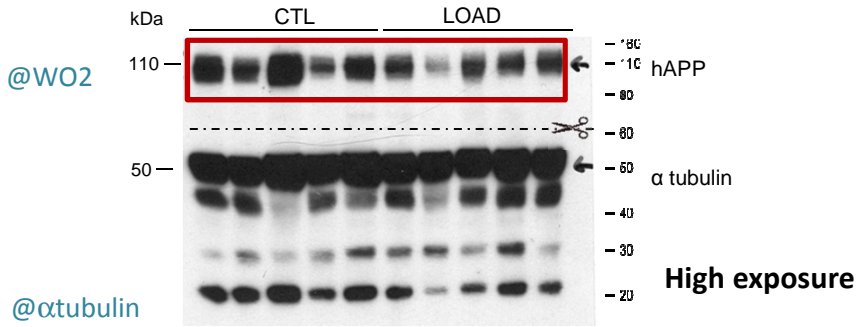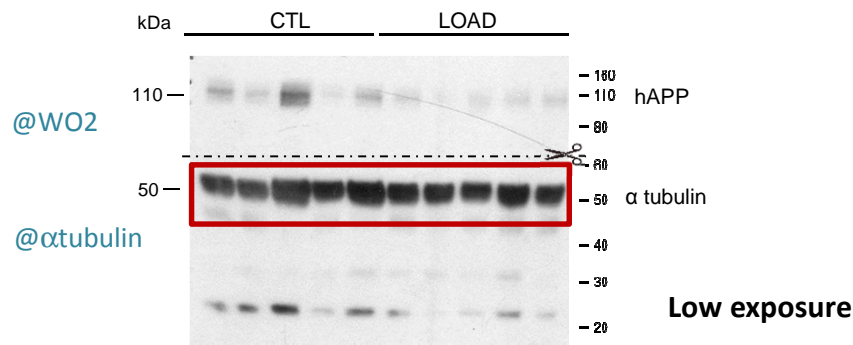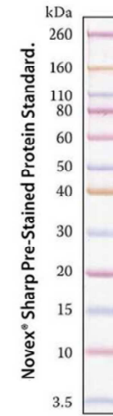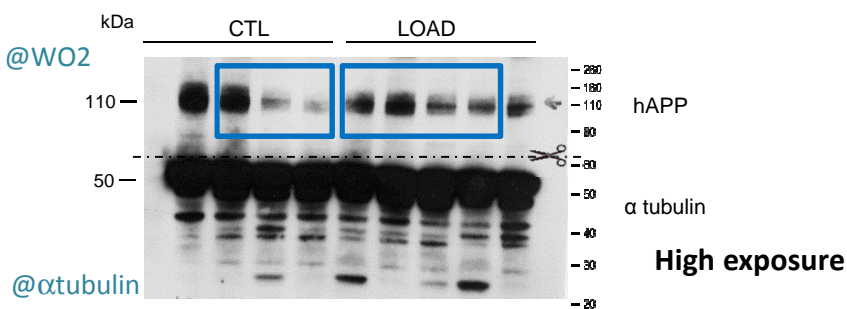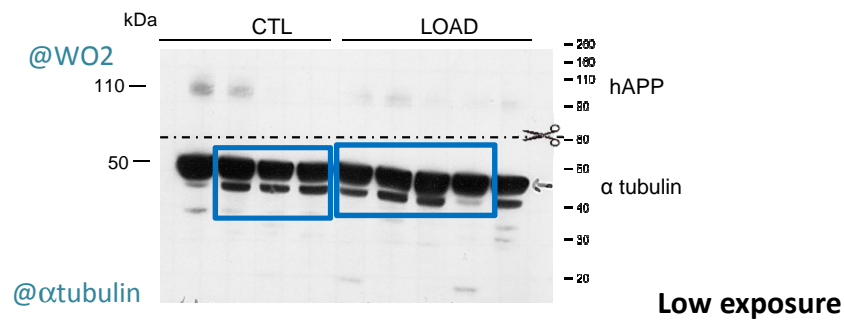

**J**

Full unedited gel for Figure 1

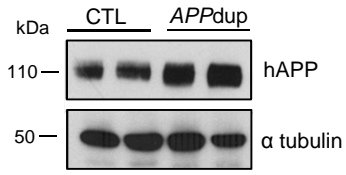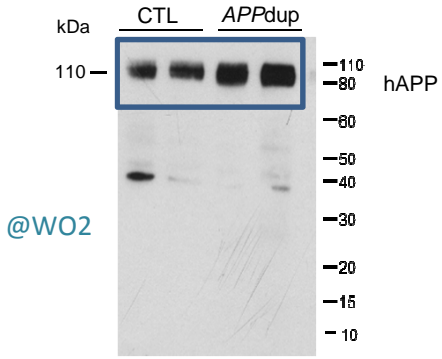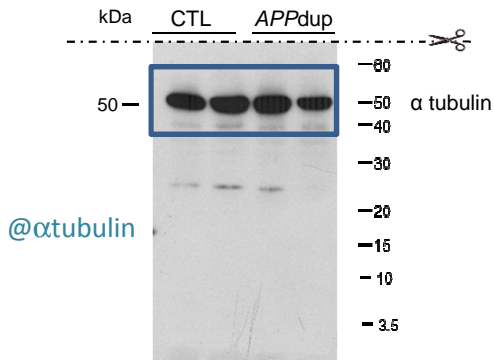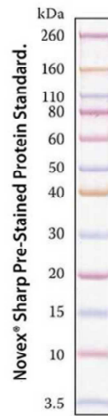

**A**

Full unedited gel for Figure 2

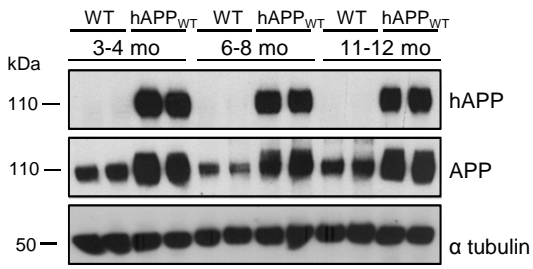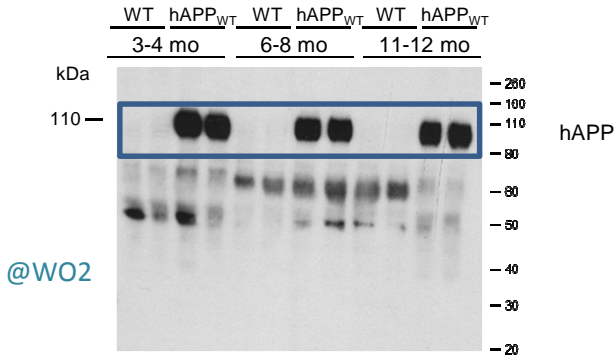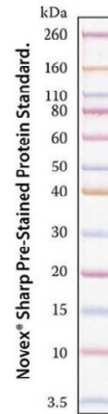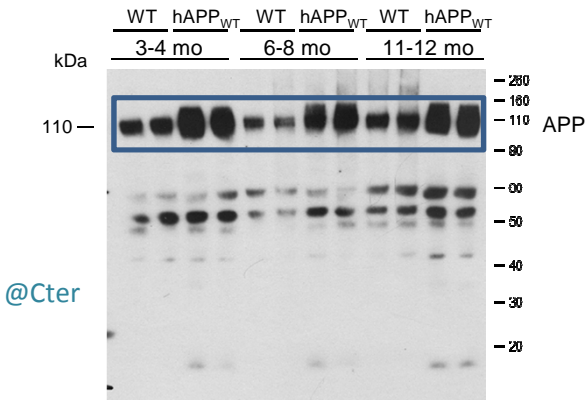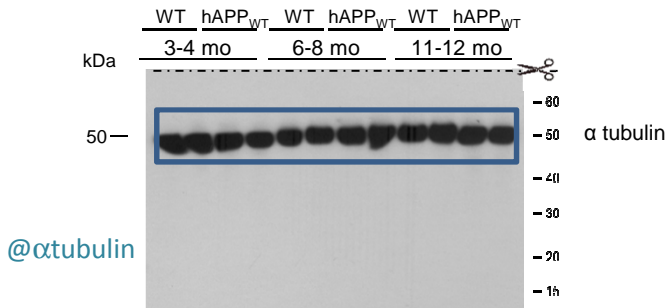



**A**

Full unedited gel for Figure 3

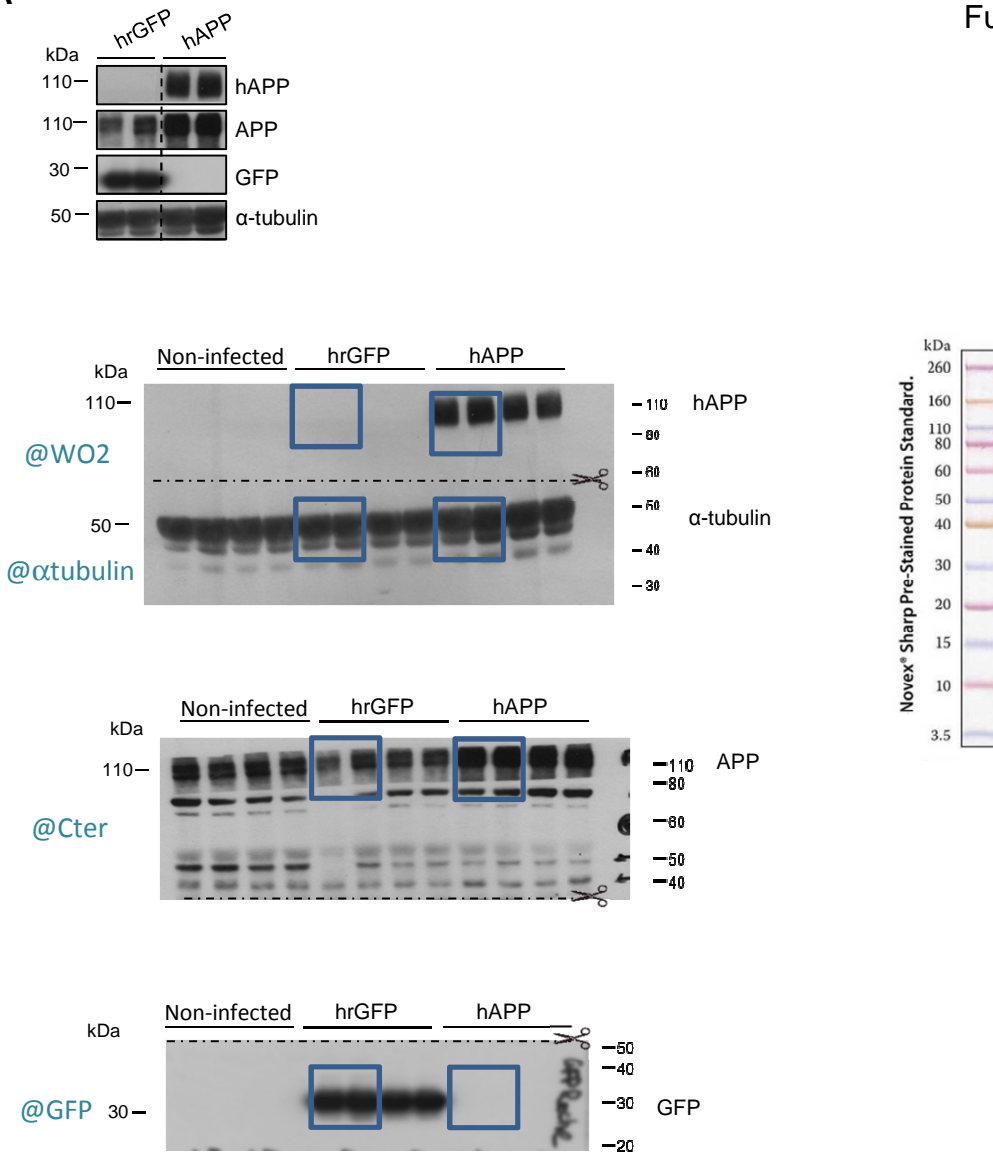

**A**

Full unedited gel for Figure 4

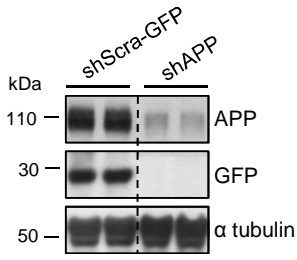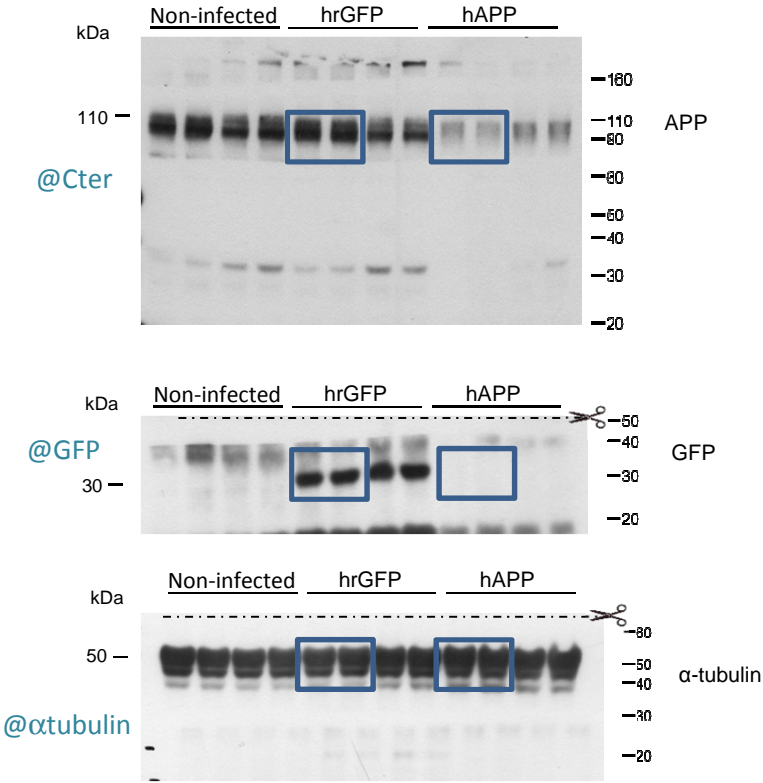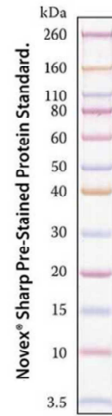

**A**

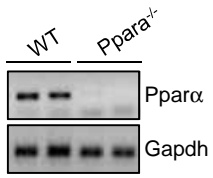

Full unedited gel for Figure 5

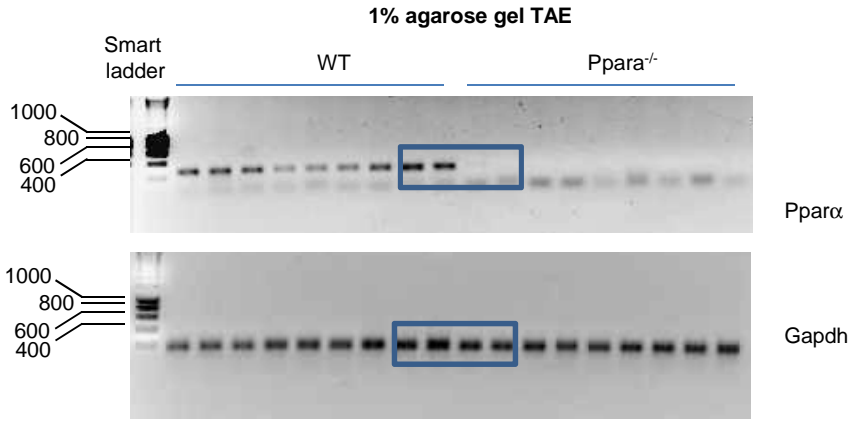

**B**

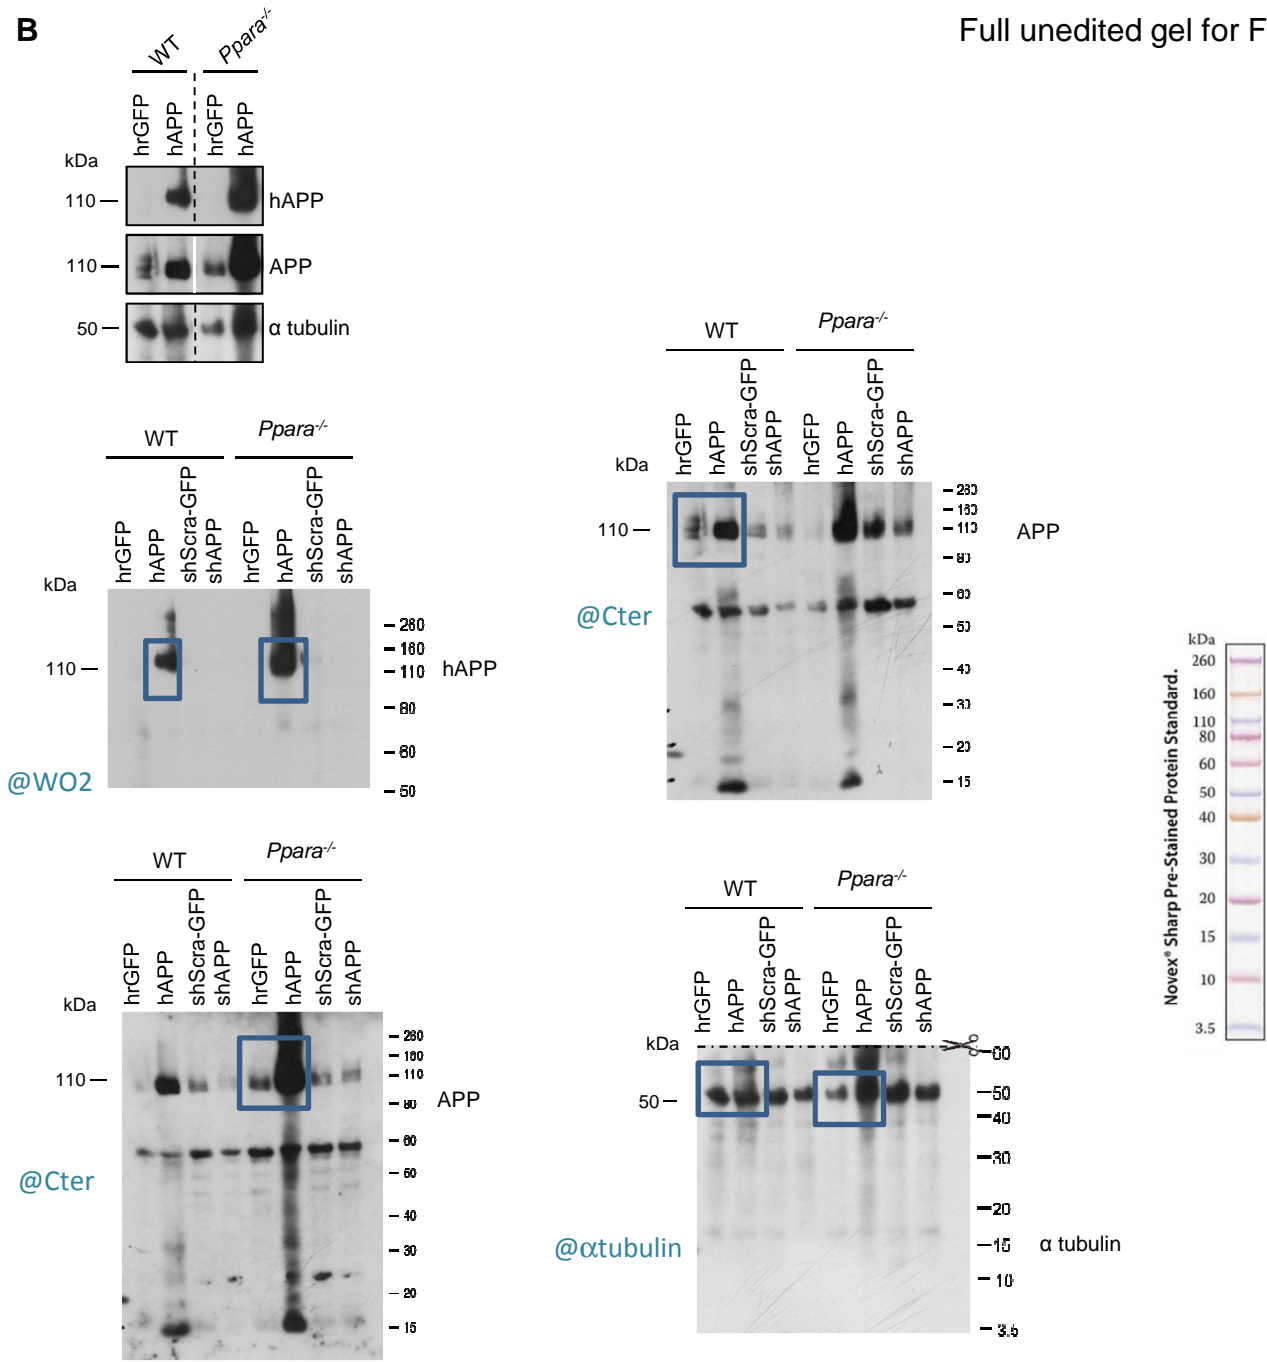

C

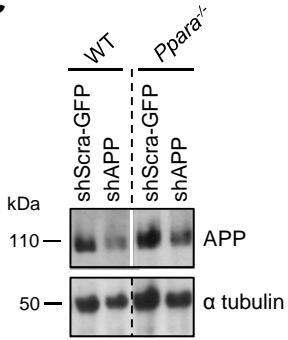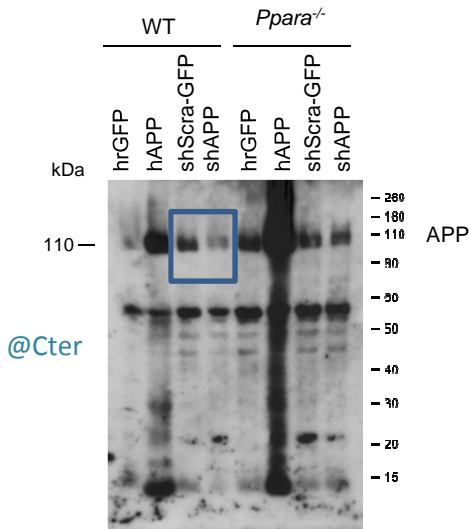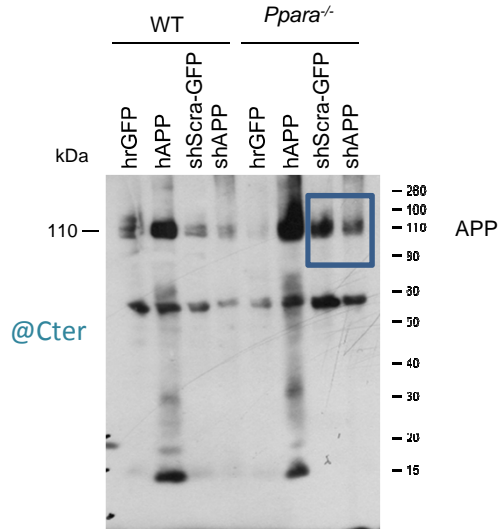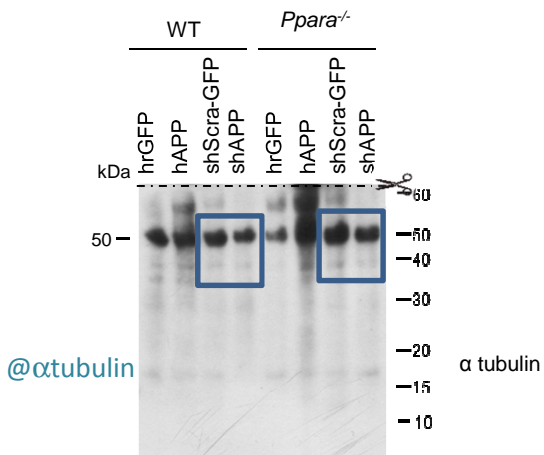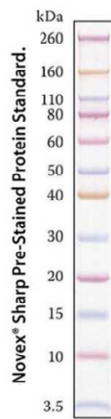

Supplement: jciinsight-6-150099-s055.pdf [file jciinsight-6-150099-s055.pdf]
